# Supplementary material for: Hydrogen alleviates mitochondrial dysfunction and organ damage via autophagy-mediated NLRP3 inflammasome inactivation in sepsis
Source: PubMed Central journal article supplement — Int J Mol Med. 2019 Aug 13;44(4):1309–24. doi: 10.3892/ijmm.2019.4311 (PMC6713420; doi:10.3892/ijmm.2019.4311), 2019-08-13
Supplement: Supplementary_Data.pdf [file Supplementary_Data.pdf]

Figure S1. Effect of autophagy on autophagy-related gene expression in macrophages induced by LPS with H<sub>2</sub>. Macrophages were treated with LPS, ATP and H<sub>2</sub>, autophagy inducer Rap and autophagy inhibitor 3-MA. The cells were collected to detect (A) LC3, (B) Beclin 1, (C) PINK and (D) Parkin by reverse transcription-quantitative PCR analysis. Data are expressed as the mean ± standard deviation (n=6). \*P<0.05 vs. Con group, \*\*P<0.05 vs. LPS group, ##P<0.05 vs. LPS+H<sub>2</sub> group. LPS, lipopolysaccharide; Rap, rapamycin; 3-MA, 3-methyladenine; LC3, microtubule-associated protein 1 light chain 3; PINK1, PTEN-induced putative kinase 1; H<sub>2</sub>, hydrogen.

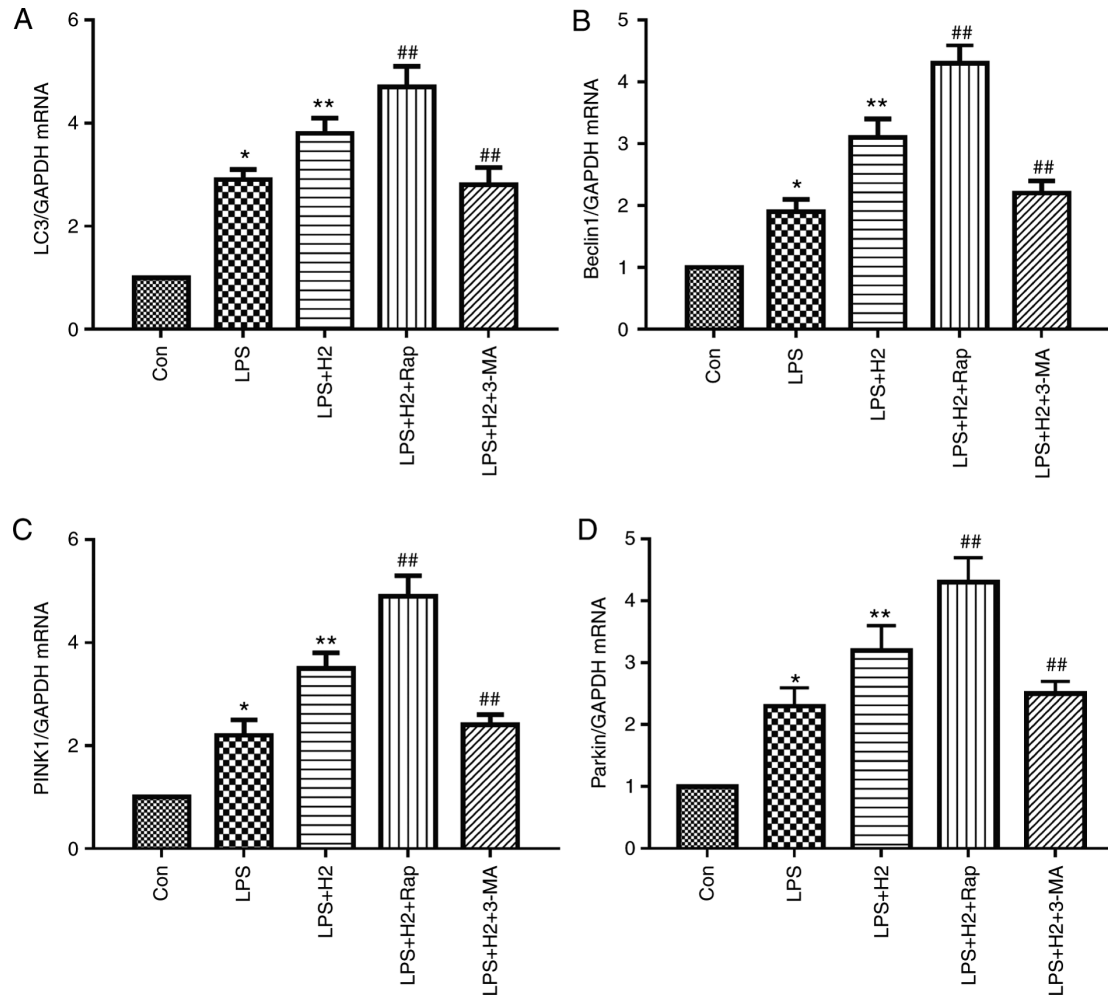

Figure S2. Effect of autophagy-mediated NACHT, LRR and PYD domains-containing protein 3 inactivation on lung injury, biochemical parameters of the liver and kidney and survival rate in LPS-induced macrophages treated with H<sub>2</sub>. Sepsis was produced by CLP. Septic mice were treated with H<sub>2</sub>, autophagy inducer Rap and autophagy inhibitor 3-MA. After 24 h, lung, liver and kidney tissues were collected to detect pathological tissue changes using hematoxylin and eosin staining. CLP, cecal ligation and puncture; Rap, rapamycin; 3-MA, 3-methyladenine; H<sub>2</sub>, hydrogen; Con, control.

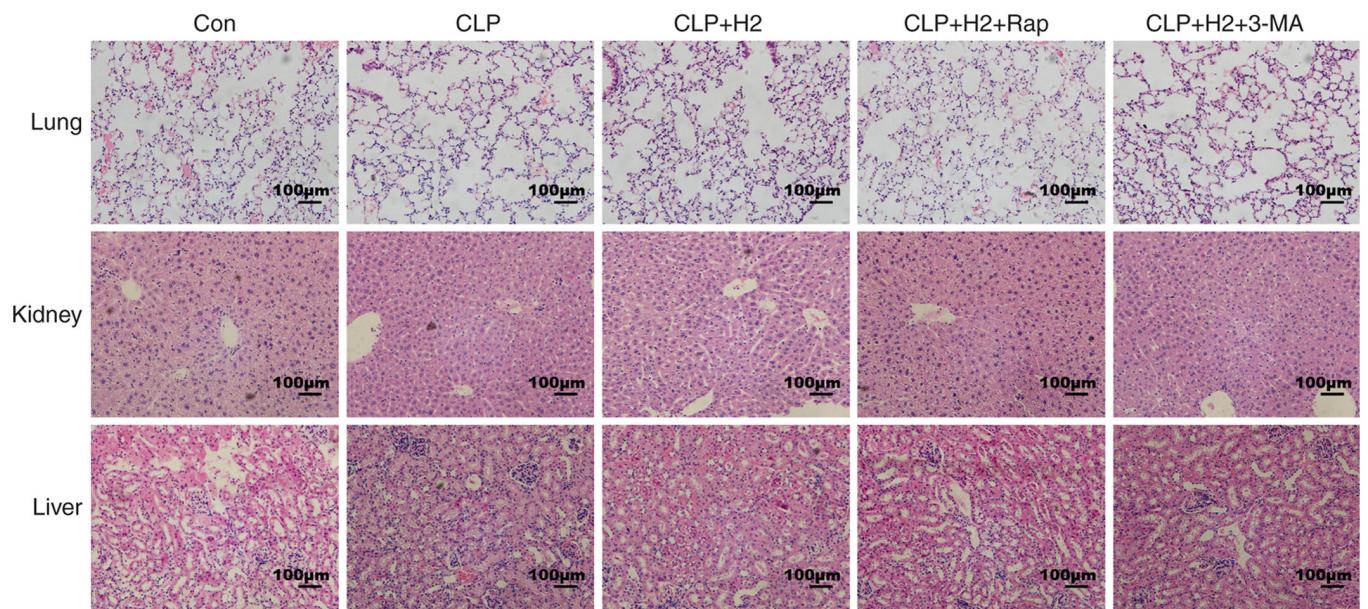

Table SI. Histological findings and scoring standard.

| Histological score | Lung                                                                                                                 | Liver                                                                                                                                                                                                            | Kidney                                                                                                                                               |
|--------------------|----------------------------------------------------------------------------------------------------------------------|------------------------------------------------------------------------------------------------------------------------------------------------------------------------------------------------------------------|------------------------------------------------------------------------------------------------------------------------------------------------------|
| 1                  | Normal                                                                                                               | Normal                                                                                                                                                                                                           | Normal                                                                                                                                               |
| 2                  | Edema, congestion, mild infiltration by alveolar macrophages, small area of hemorrhage                               | Swollen hepatocytes, disappearance of sinus hepaticus, mild periportal neutrophil and macrophage infiltration                                                                                                    | Edema, congestion, mild leukocyte infiltration in glomeruli, vacuolar degeneration in the nucleus of epithelial cells                                |
| 3                  | Large area of hemorrhage, severe macrophage infiltration and proliferation, consolidation involving half of the lung | Changes seen above; in addition, lightly dyed nuclei or obscure nuclei of hepatocytes, vacuolar degeneration or ballooning degeneration of hepatocytes, severe periportal neutrophil and macrophage infiltration | Changes seen above; in addition, acute tubular atrophy, severe leukocyte infiltration in glomeruli, protein casts in the medulla, glomerulosclerosis |
| 4                  | Changes seen above; in addition, severe hemorrhage and consolidation involving almost the entire lung                | Changes seen above; in addition, granulomas with lipid-laden macrophages, lymphoplasmocytic reaction, focal necrosis of hepatocytes                                                                              |                                                                                                                                                      |
